# Supplementary material for: Comparison of Pregnancy Preferences Preceding vs Year 1 of the COVID-19 Pandemic
Source: PubMed Central journal article supplement (PMC9257576; doi:10.1001/jamanetworkopen.2022.20093), 2022-07-05
Supplement: jamanetwopen-e2220093-s001.pdf [file jamanetwopen-e2220093-s001.pdf]

## Supplemental Online Content

Rocca CH, Parra M, Muñoz I, Foster DG, Boscardin WJ, Ralph LJ. Comparison of pregnancy preferences preceding vs year 1 of the COVID-19 pandemic. *JAMA Netw Open*. 2022;5(7):e2220093. doi:10.1001/jamanetworkopen.2022.20093

**eFigure.** Centers for Disease Control and Prevention Tracking of the Trend in Number and Seven-Day Average of Positive COVID-19 Cases in Arizona, March 15, 2020-March 15, 2021

**eTable.** Desire to Avoid Pregnancy (DAP) Scale Sample Item Frequencies at Baseline (N=627), Selected From 14 Items

This supplemental material has been provided by the authors to give readers additional information about their work.

**eFigure.** Centers for Disease Control and Prevention Tracking of the Trend in Number and Seven-Day Average of Positive COVID-19 Cases in Arizona, March 15, 2020-March 15, 2021

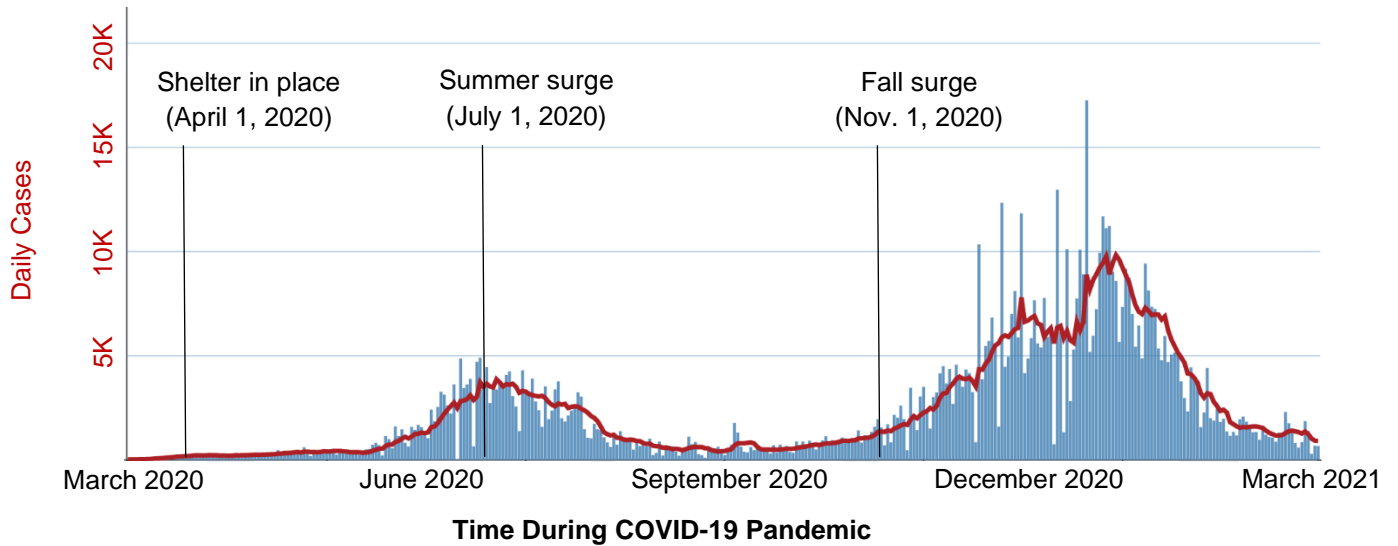

Adapted from: Centers for Disease Control and Prevention. COVID Data Tracker. <https://covid.cdc.gov/covid-data-tracker/#datatracker-home>. Published 2021. Accessed October 1, 2021.

**eTable.** Desire to Avoid Pregnancy (DAP) Scale Sample Item Frequencies at Baseline (N=627), Selected From 14 Items

|                                                                                               | N (%)      |
|-----------------------------------------------------------------------------------------------|------------|
| <b>I want to have a baby within the next year.</b>                                            |            |
| Strongly agree                                                                                | 86 (13.7)  |
| Agree                                                                                         | 63 (10.1)  |
| Neither agree nor disagree                                                                    | 92 (14.7)  |
| Disagree                                                                                      | 159 (25.4) |
| Strongly disagree                                                                             | 227 (36.2) |
| <b>It would be the end of the world for me to have the baby in the next year.</b>             |            |
| Strongly agree                                                                                | 70 (11.2)  |
| Agree                                                                                         | 53 (8.5)   |
| Neither agree nor disagree                                                                    | 120 (19.1) |
| Disagree                                                                                      | 183 (29.2) |
| Strongly disagree                                                                             | 201 (32.1) |
| <b>Thinking about becoming pregnant in the next 3 months makes me feel excited.</b>           |            |
| Strongly agree                                                                                | 68 (10.9)  |
| Agree                                                                                         | 64 (10.2)  |
| Neither agree nor disagree                                                                    | 139 (22.2) |
| Disagree                                                                                      | 136 (21.7) |
| Strongly disagree                                                                             | 220 (35.1) |
| <b>If I had a baby in the next year, it would be hard for me to manage raising the child.</b> |            |
| Strongly agree                                                                                | 108 (17.2) |
| Agree                                                                                         | 94 (15.0)  |
| Neither agree nor disagree                                                                    | 152 (24.2) |
| Disagree                                                                                      | 158 (25.2) |
| Strongly disagree                                                                             | 115 (18.3) |
